# Supplementary material for: A Highly Sensitive, Ultra-Durable, Eco-Friendly Ionic Skin for Human Motion Monitoring
Source: MDPI journal article supplement (doi:10.3390/polym14091902), 2022-05-06
Supplement: s1 [file s1]

# Supplementary Material: A Highly Sensitive, Ultra-Durable, Eco-Friendly Ionic Skin for Human Motion Monitoring

Zhaoxin Li, Haoyan Xu, Na Jia, Yifei Li, Liangkuan Zhu and Zhuangzhi Sun

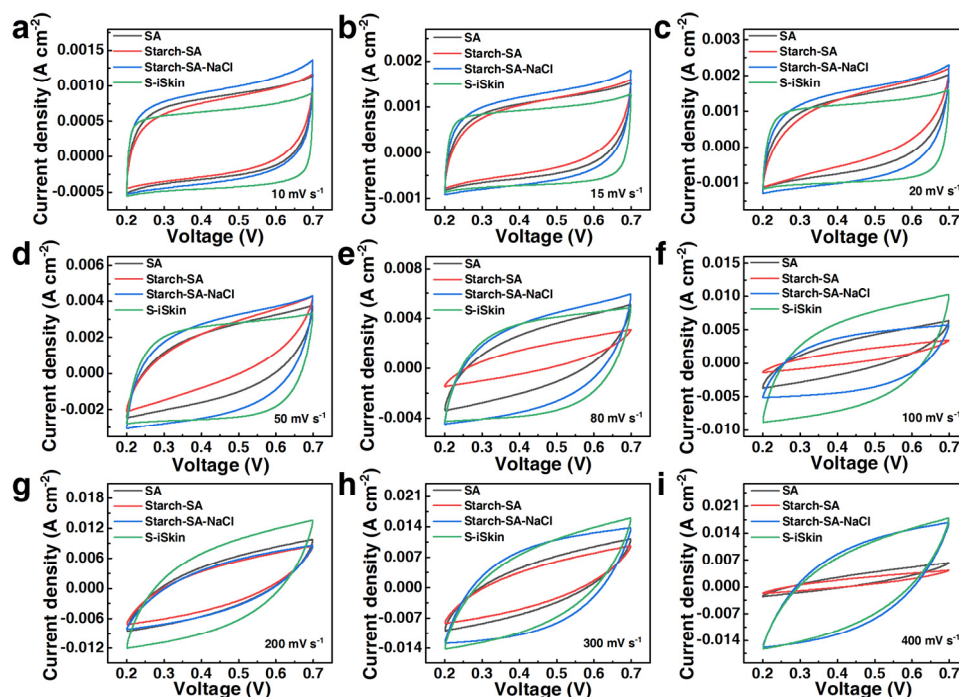

Figure S1. CV curves of the S-iSkin: (a) 10 mV s<sup>-1</sup>, (b) 15 mV s<sup>-1</sup>, (c) 20 mV s<sup>-1</sup>, (d) 50 mV s<sup>-1</sup>, (e) 80 mV s<sup>-1</sup>, (f) 100 mV s<sup>-1</sup>, (g) 200 mV s<sup>-1</sup>, (h) 300 mV s<sup>-1</sup>, (i) 400 mV s<sup>-1</sup>.

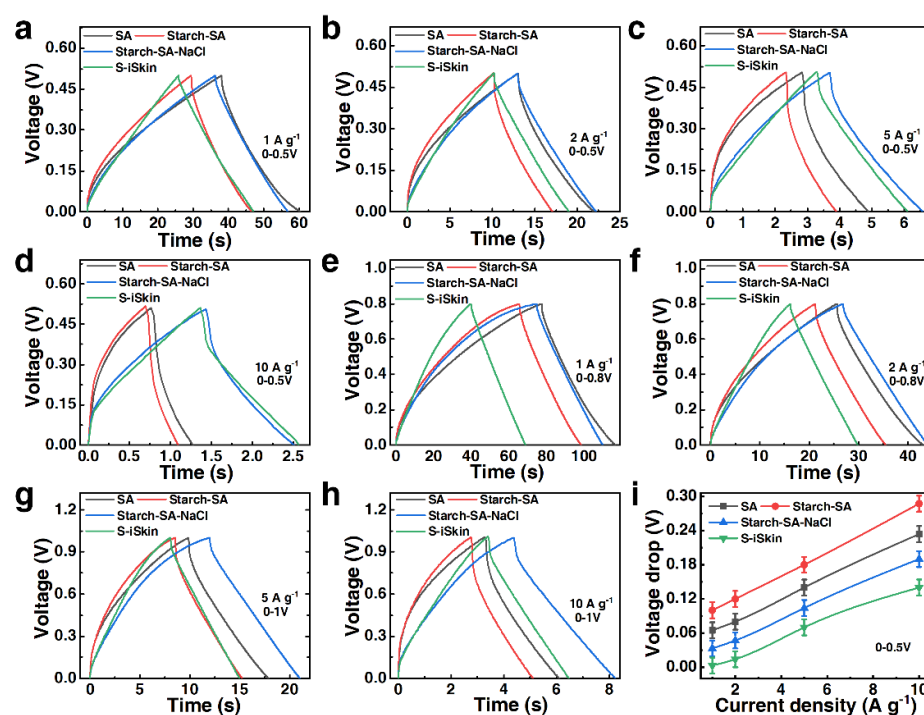

Figure S2. GCD curves of the S-iSkin under different current densities: (a)–(h) GCD curves, (i) Relationship curves of voltage drop varied with the current density.

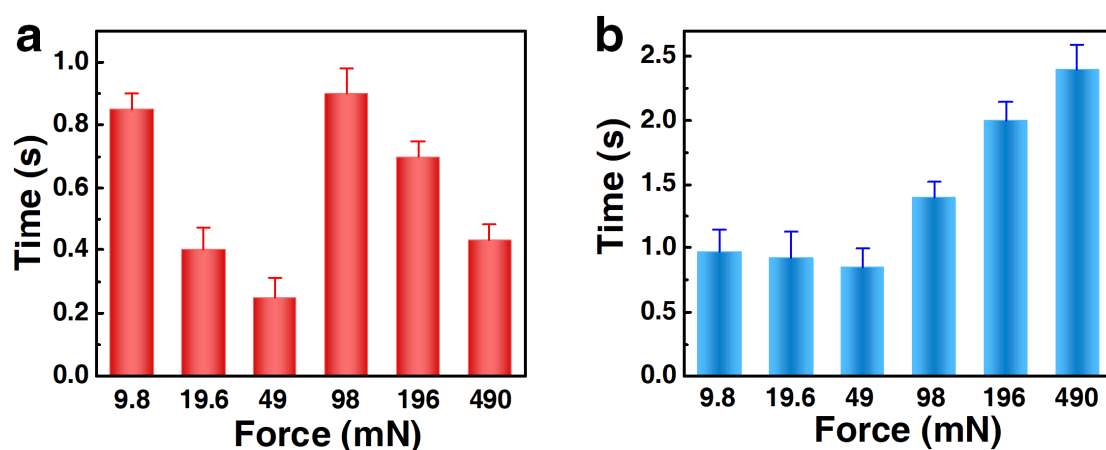

Figure S3. Response time and recovery time of the S-iSkin: (a) Response time and (b) Recovery time.

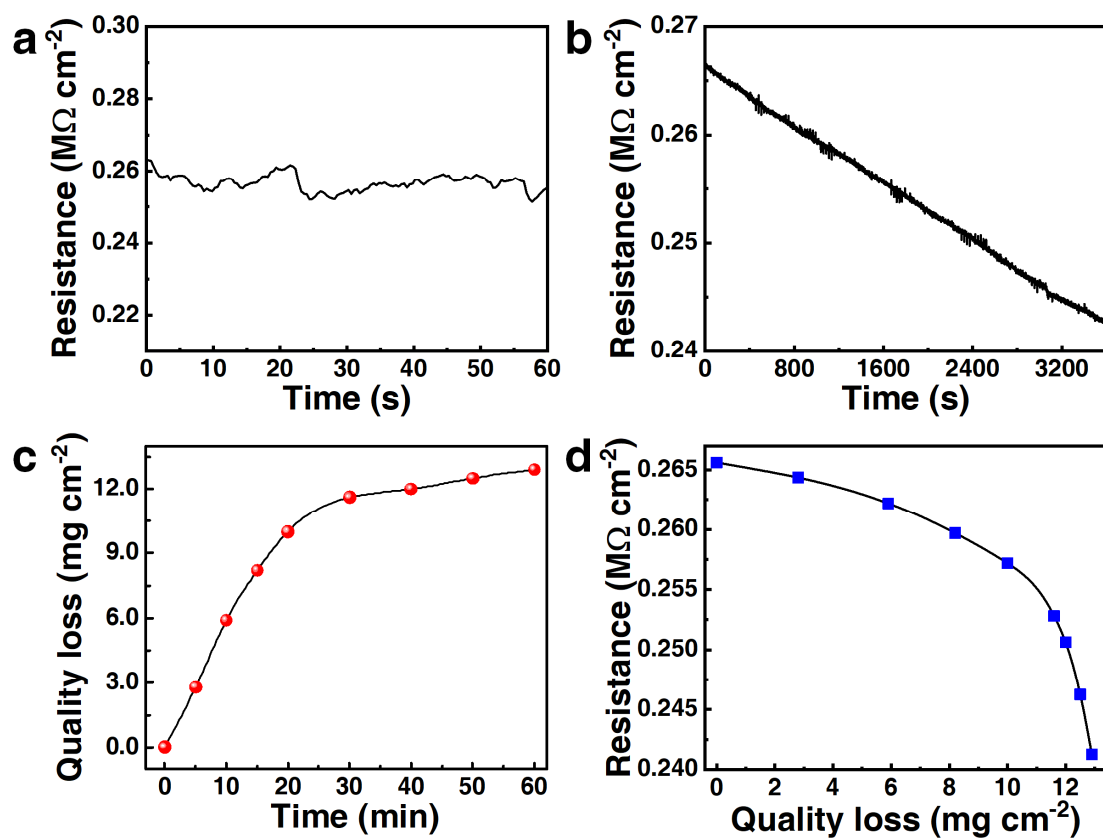

Figure S4. Variation curve of resistance and humidity of the S-iSkin: (a) Resistance of S-iSkin. (b) Variation of resistance value of the S-iSkin with evaporation of water. (c) The water loss rate of the S-iSkin. (d) The relationship between the water loss of the S-iSkin and its resistance value.

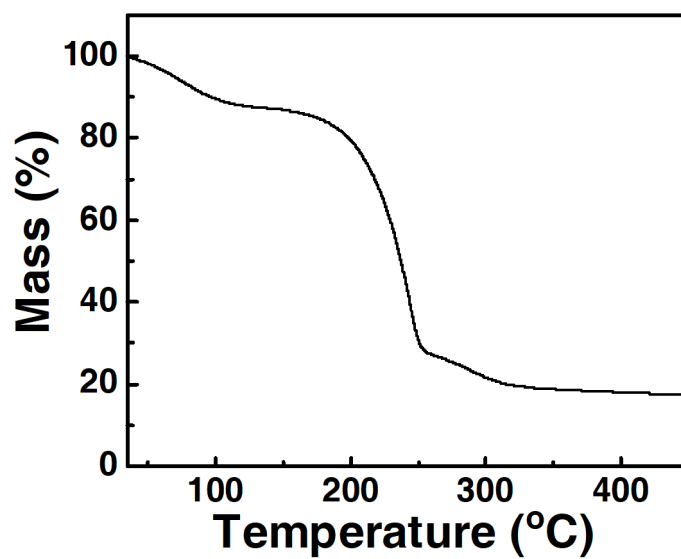

**Figure S5.** The thermogravimetric analysis of the S-iSkin.

**Table S1.** Comparison of sensitivity, response time and recovery time with other articles.

|         | Sensitivity | Response time(ms) | Recovery time(ms) |
|---------|-------------|-------------------|-------------------|
| S-iSkin | 52.04       | 15                | 48                |
| Ref.31  | 0.055       | 60                | 90                |
| Ref.32  | 0.23        | 27.9              | 18.1              |
| Ref.33  | 74.8        | 36                | 30                |
| Ref.34  | 64.2        | 720               | 2820              |
| Ref.35  | 1.2         | 86                | 101               |
